# Supplementary material
Source: PubMed Central journal article supplement (PMC7610463)

---

**Supplementary information**

---

**An intramembrane chaperone complex facilitates membrane protein biogenesis**

---

In the format provided by the authors and unedited

**Supplementary Figure 1. Uncropped autoradiographs and gels.**

Shown are all gels prior to cropping for display in the figures.

Instances where full gels are shown in the figure are not replicated here. All IVT reactions were controlled for loading by coomassie staining and visualisation of endogenous lysate proteins. All IPs were controlled for recovery and loading by coomassie staining and visualisation of the antibody. Loading controls for cell lysates are displayed within the figure and were also controlled by visualizing the stained gel or blot.

**Fig. 1a Sec61 $\alpha$  IPs**

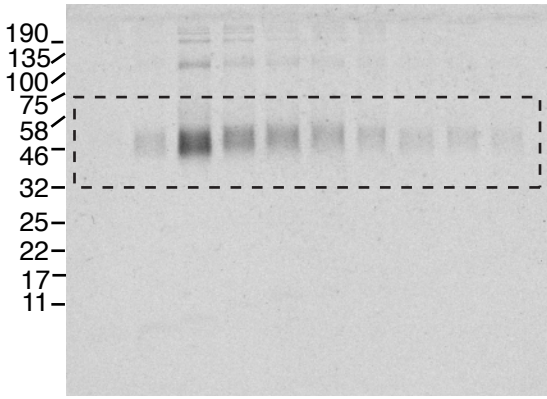

**Fig. 1d**

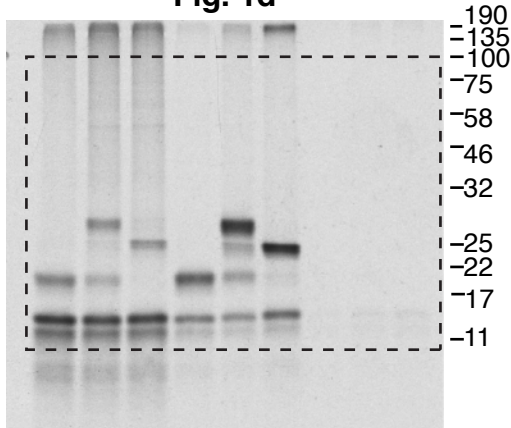

**Fig. 1f**

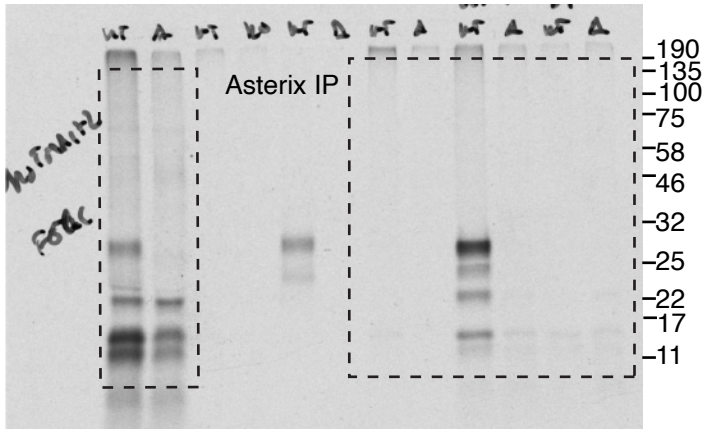

**Fig. 2b**

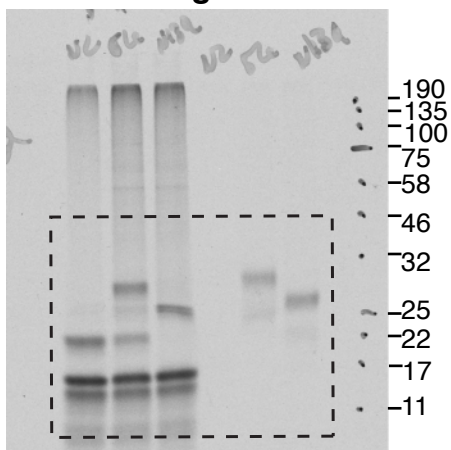

**Fig. 1b**

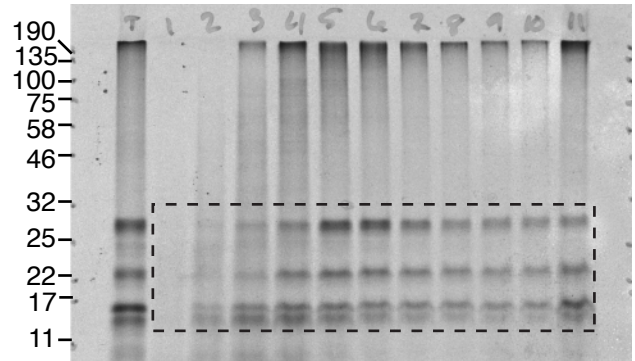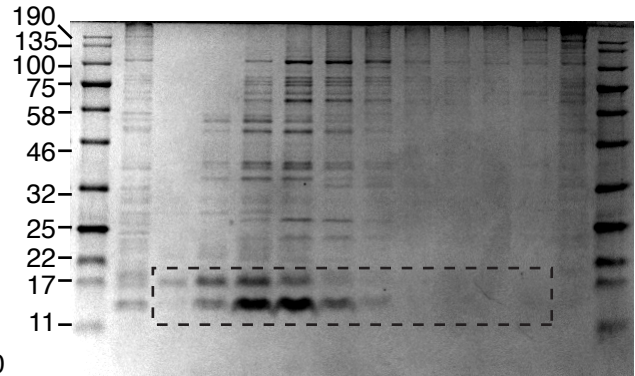

**Fig. 1e**

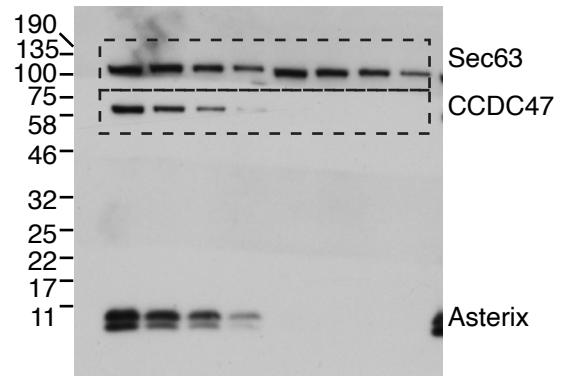

**Fig. 2a**

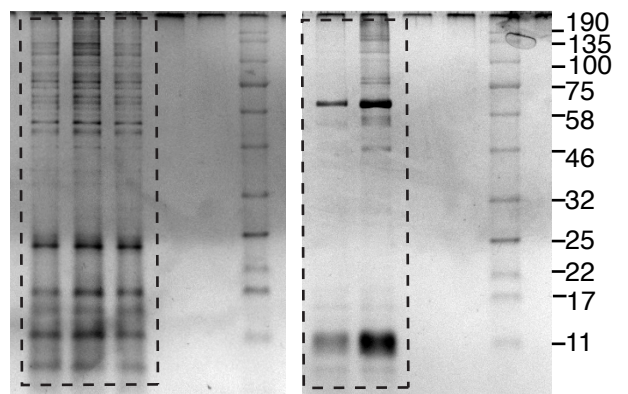

**Fig. 2d**

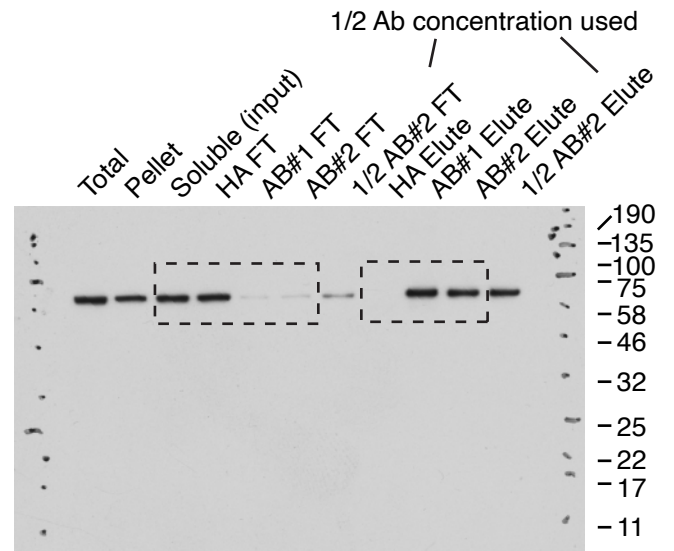

**Fig. 2c**

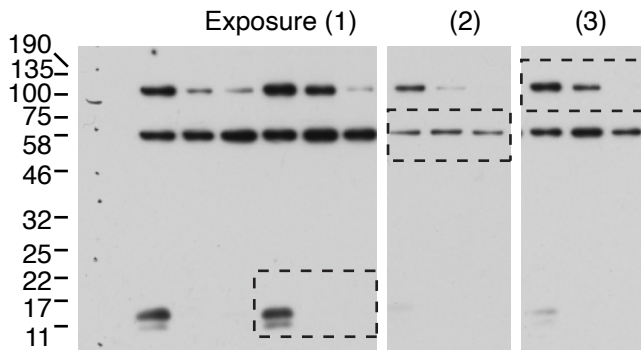

**Fig. 4b (upper panel)**

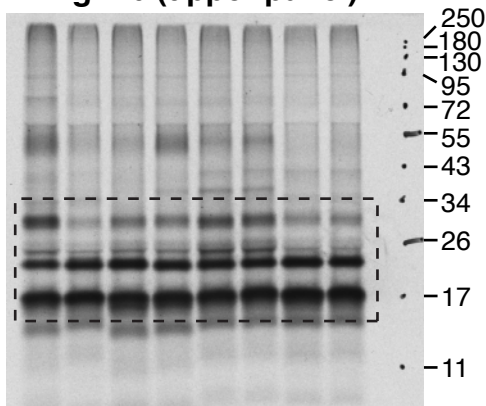

**Fig. 2d**

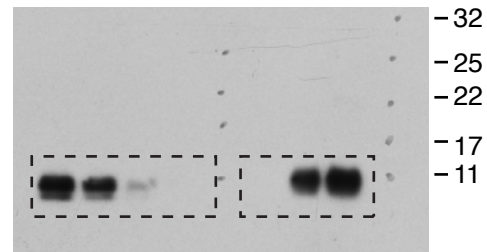

**Fig. 4e**

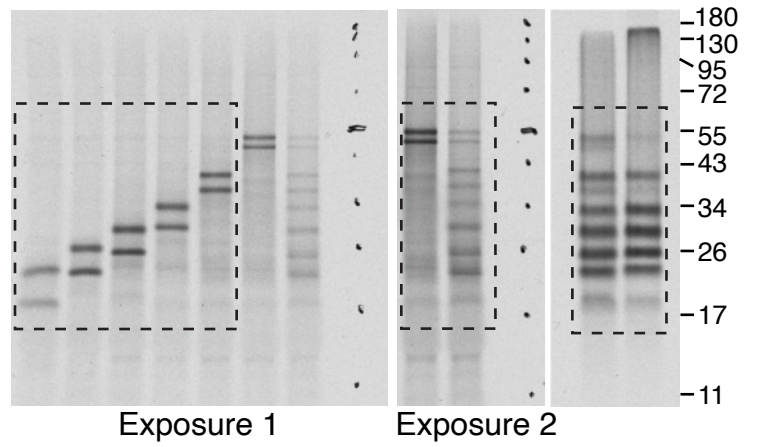

**Fig. 4c**

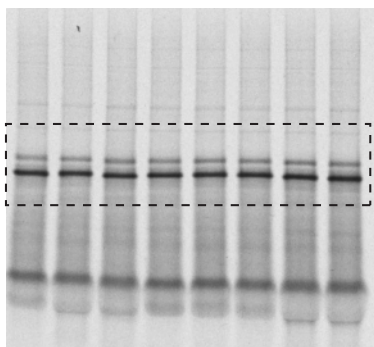

**Fig. 4d**

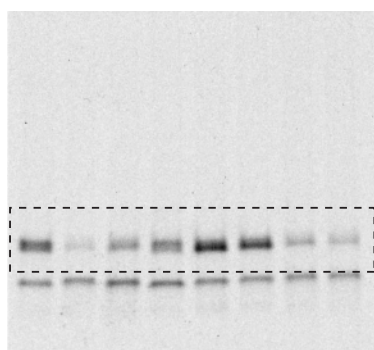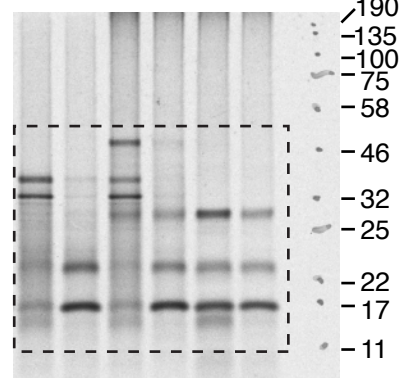

Phosphor Screen  
(No MW Ladder)

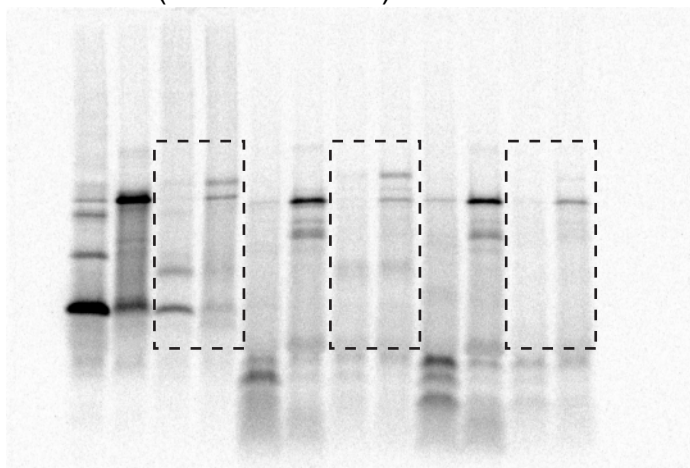

**Extended data Figure 1c**

Phosphor Screen  
(No MW Ladder)

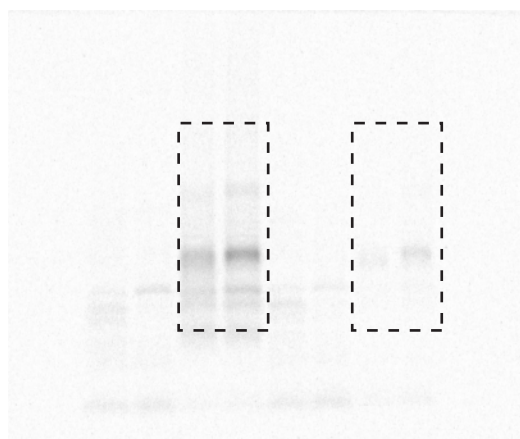

Phosphor Screen  
(No MW Ladder)

**Extended Data Figure 1b**

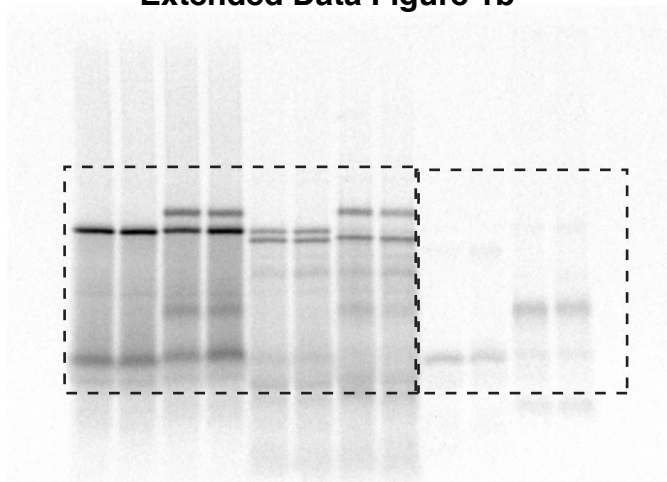

Phosphor Screen  
(No MW Ladder)  
**Extended data Figure 2c**

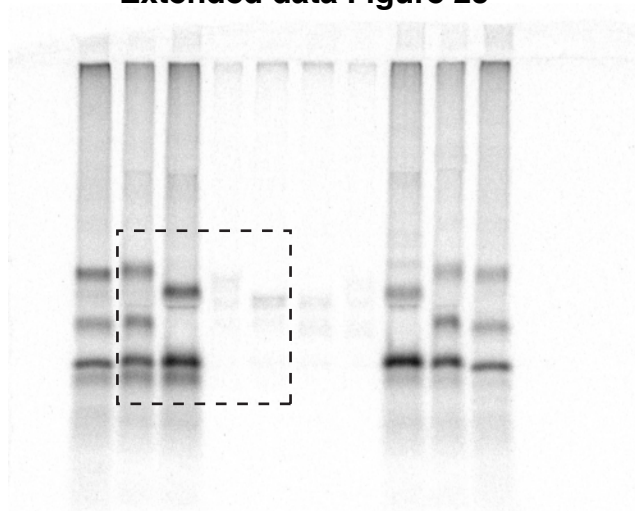

**Extended data Figure 2d**

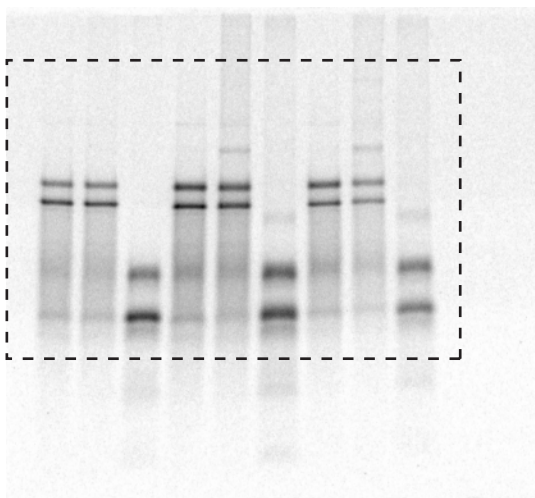

Extended data Figure 2e

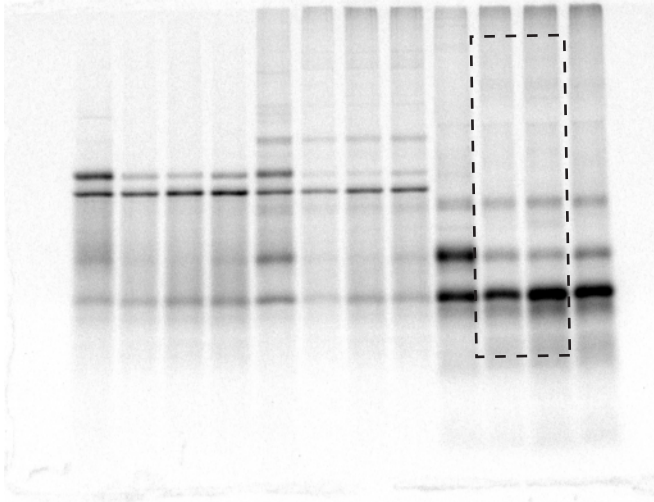

Phosphor Screen  
(No MW Ladder)

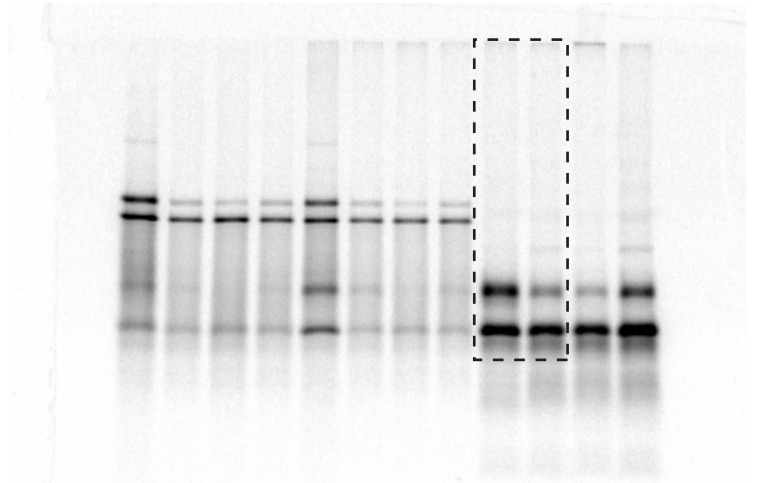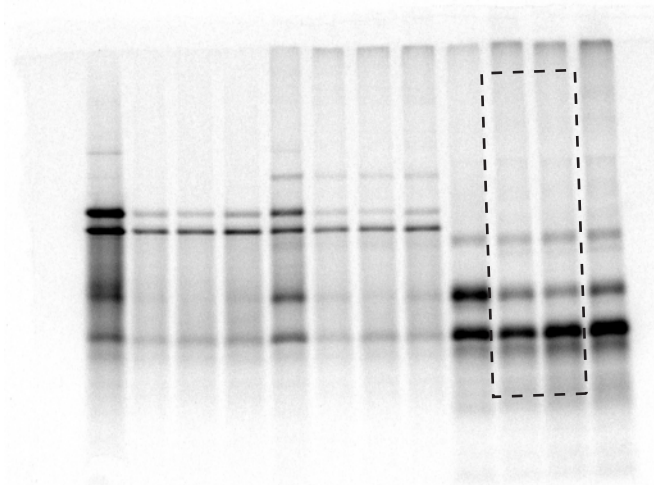

Extended data Figure 3a and 3b

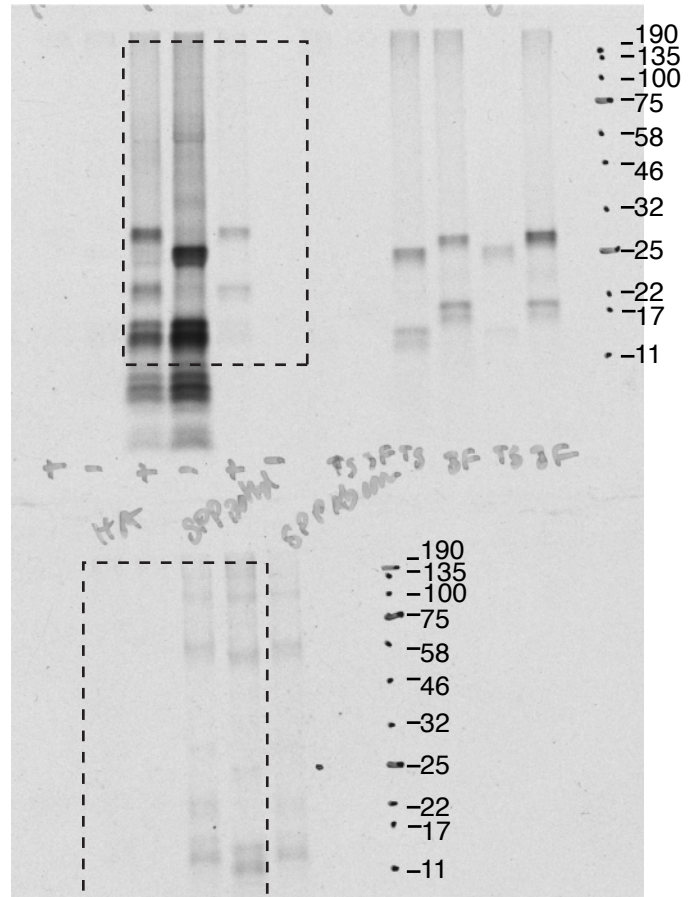

Extended data Figure 3a

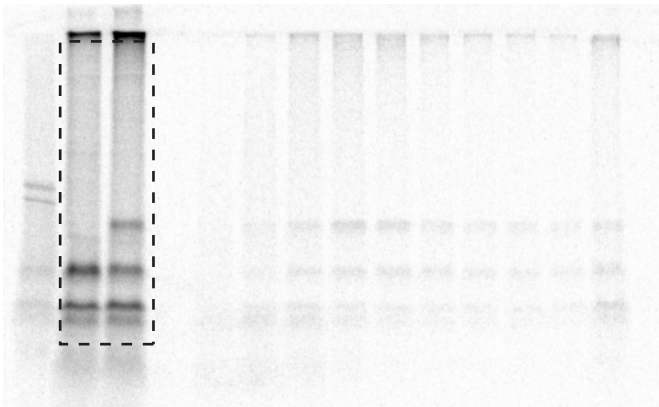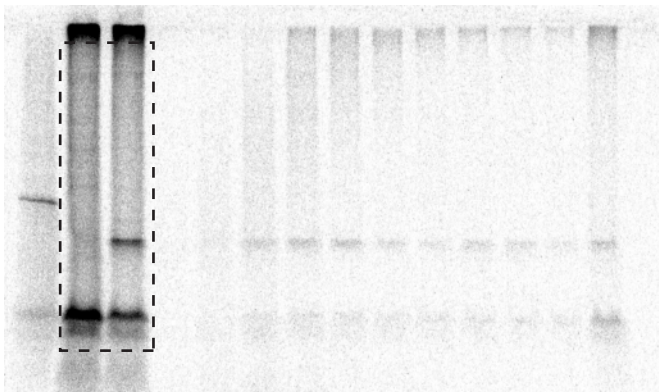

Extended data Figure 4c

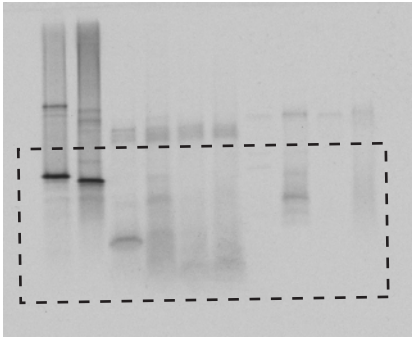

Extended data Figure 4e

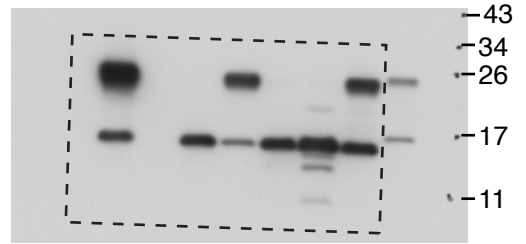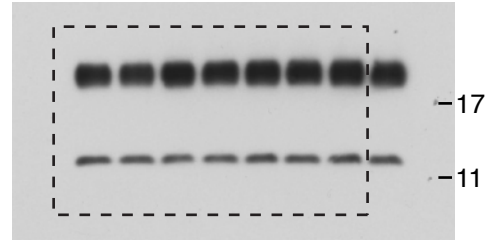

Separate Gels

Extended data Figure 4e

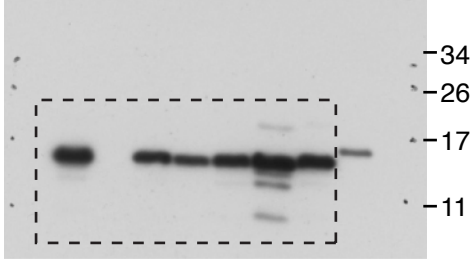

Extended data Figure 8

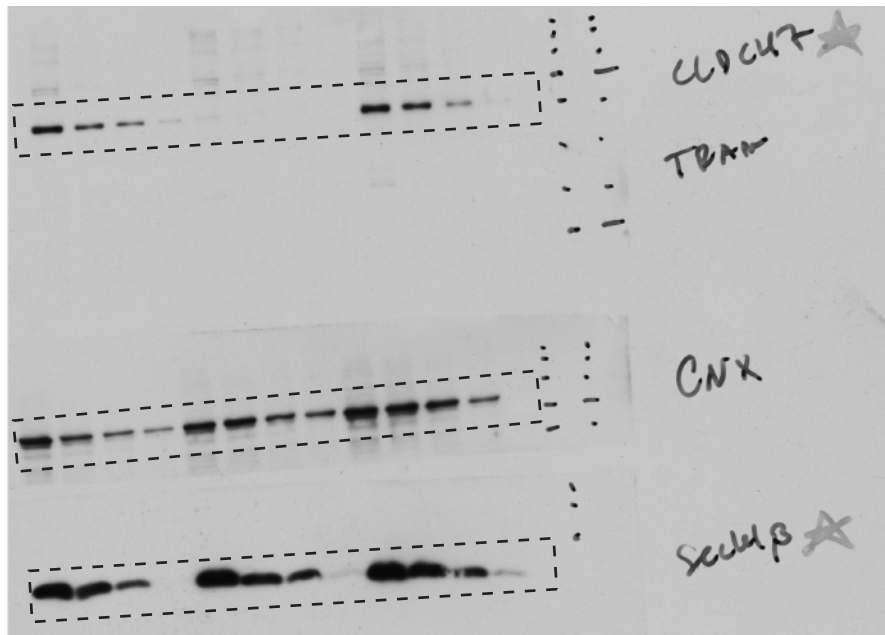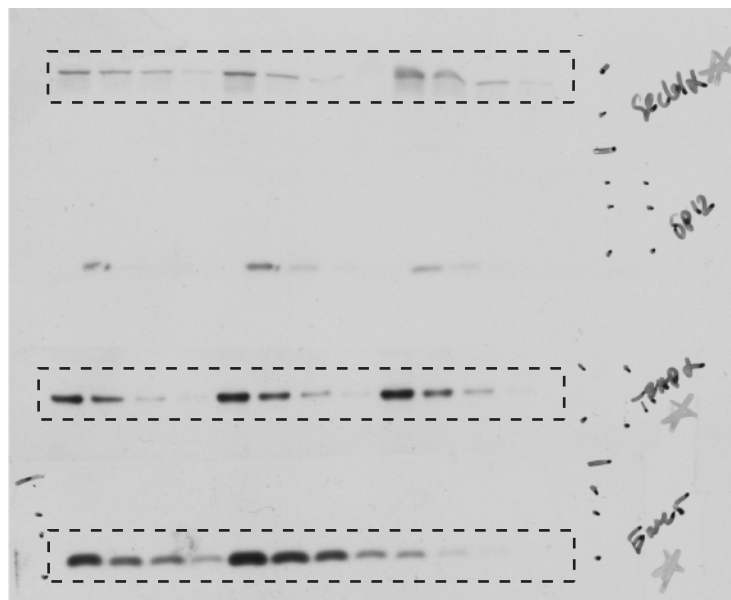

Extended data Figure 8 continued

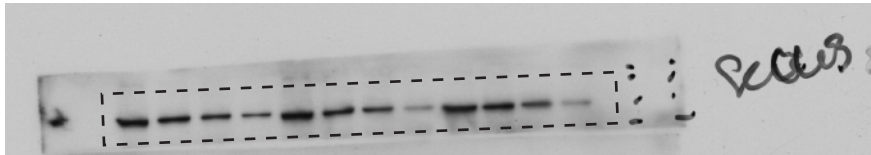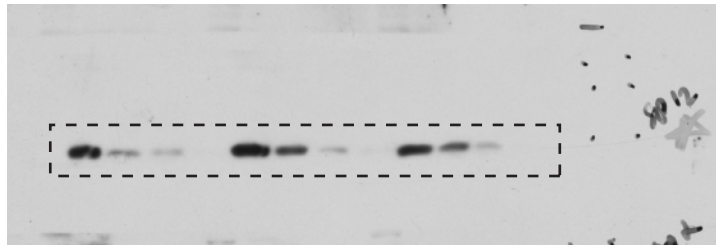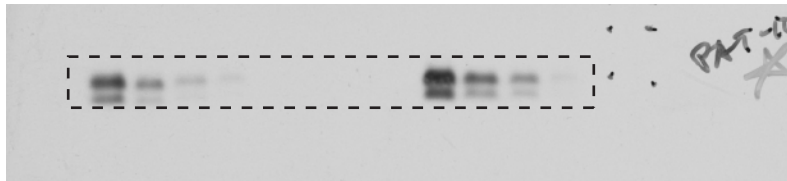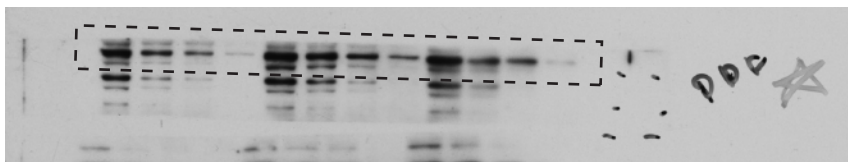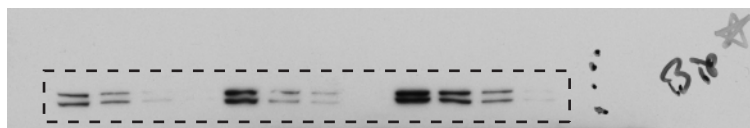

Supplement: EMS119938-supplement-Supplementary_information.pdf [file EMS119938-supplement-Supplementary_information.pdf]
